# Supplementary material for: LncRNA CSMD1-1 promotes the progression of Hepatocellular Carcinoma by activating MYC signaling
Source: PubMed Central journal article supplement (PMC7359090; doi:10.7150/thno.45989), 2020-06-12
Supplement: thnov10p7527s1.pdf [file thnov10p7527s1.pdf]

## **Supplemental Materials**

### **LncRNA CSMD1 promotes proliferation and invasion of hepatocellular carcinoma by activating MYC signaling**

Ji Liu<sup>\*1</sup>, Rui Xu<sup>\*2</sup>, Shi-Juan Mai<sup>\*1</sup>, Yu-Shui Ma<sup>3</sup>, Mei-Yin Zhang<sup>1</sup>, Ping-Sheng Cao<sup>3</sup>, Nuo-Qing Weng<sup>1</sup>, Rui-Qi Wang<sup>1</sup>, Di Cao<sup>1</sup>, Wei Wei<sup>4</sup>, Rong-Ping Guo<sup>4</sup>, Yao-Jun Zhang<sup>4</sup>, Li Xu<sup>4</sup>, Min-Shan Chen<sup>4</sup>, Hui-Zhong Zhang<sup>5</sup>, Long Huang<sup>6</sup>, Da Fu<sup>#3</sup>, and Hui-Yun Wang<sup>#1</sup>.

**1. Supplemental Figures: 9 figures.**

**2. Supplemental Tables: 9 tables.**

## 1. SUPPLEMENTAL FIGURES

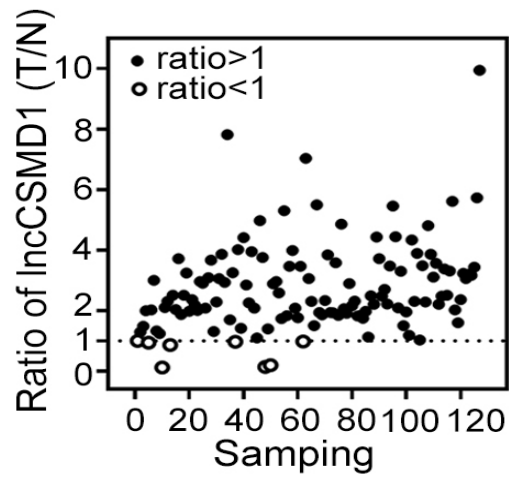

**Figure S1. lncCSMD1 is upregulated in HCC tissues.** lncCSMD1 expression level was detected with qRT-PCR in 127 paired HCC and adjacent non-tumor liver tissues randomly selected from the Validation Cohort. lncCSMD1 expression ratio (tumor to peritumor liver) > 1 was observed in 93.7% (119/127) of HCC tissues.

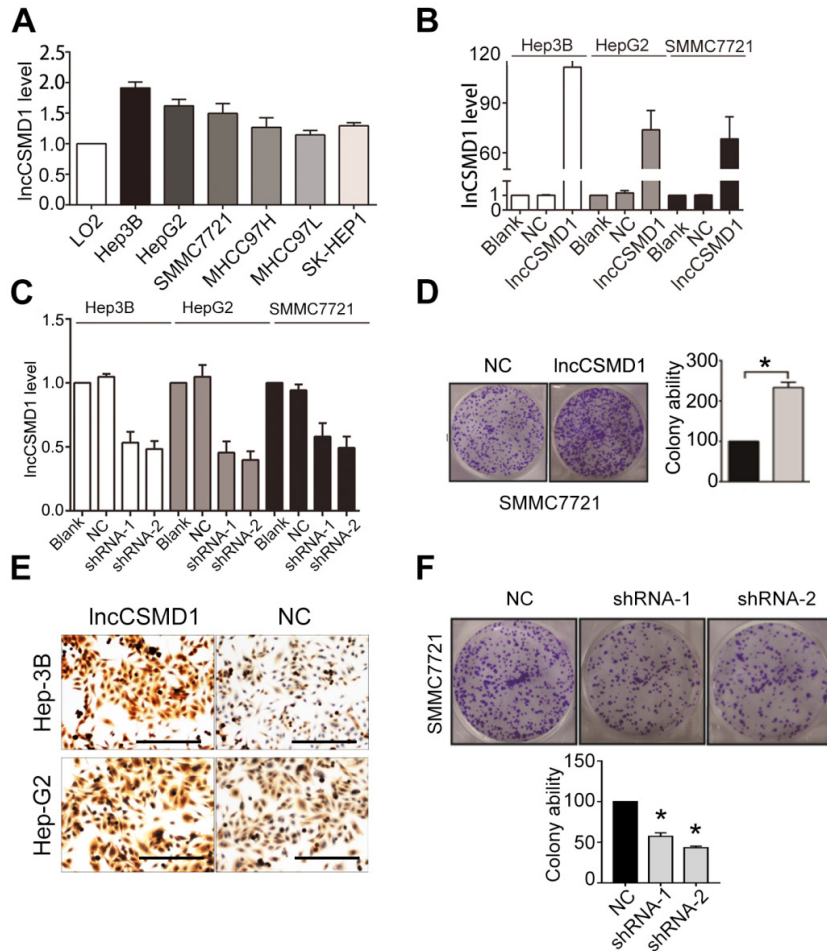

**Figure S2. IncCSMD1 overexpression enhances growth of HCC cells.** (A) qRT-PCR analysis shows that IncCSMD1 is upregulated in 6 HCC cells when compared with that in a normal liver cell. (B) IncCSMD1 is stably overexpressed in Hep3B, HepG2 and SMMC7721 cells transfected with lentivirus containing IncCSMD1 compared with the control cells, as shown by qRT-PCR. (C) IncCSMD1 expression was downregulated by shRNA against IncCSMD1 in Hep3B, HepG2 and SMMC7721 cells, as determined by qRT-PCR. (D) Ectopic expression of IncCSMD1 facilitates colony formation of SMMC7721 cells compared with the control cells. (E) High expression of PCNA protein in the Hep3B and HepG2 cells with stable overexpression of IncCSMD1 was detected with IHC compared with the control cells, suggesting that HCC cells with overexpression of IncCSMD1 have higher proliferation index. (F) HCC cells with IncCSMD1 downregulation exhibit fewer Colonies than the control HCC cells. Data represent the mean  $\pm$  SD of triplicate experiments and was analyzed by Student t test. \* $p < 0.05$ .

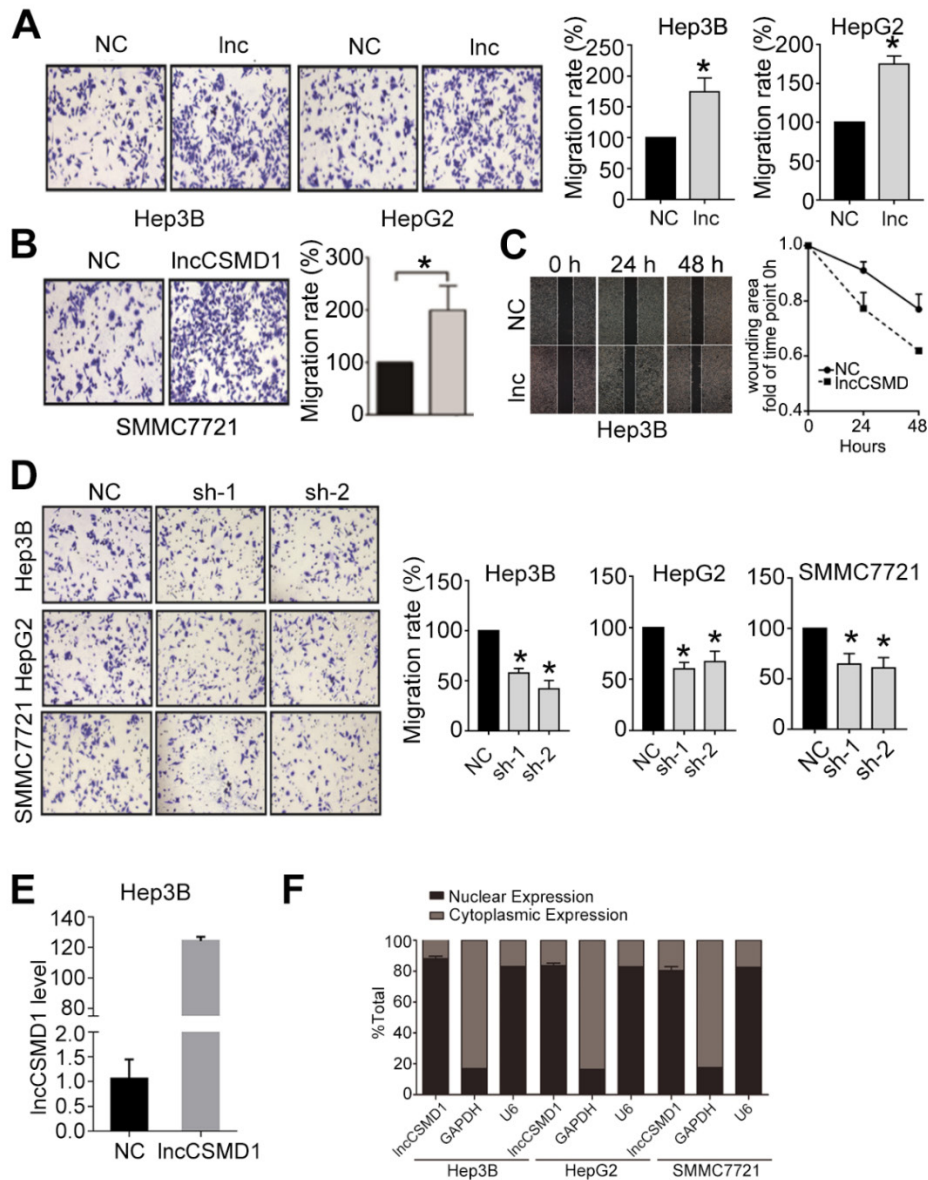

**Figure S3. IncCSMD1 expression affects the migration of HCC cells.** (A, B) Ectopic expression of IncCSMD1 facilitates the migration of Hep3B, HepG2 and SMMC7721 cells, as shown by the transwell assay. (C) Wound scratch assay indicates that IncCSMD1 expression can promote the migration of Hep3B cells. (D) Knockdown of IncCSMD1 inhibits the migration of Hep3B, HepG2 and SMMC7721 cells, as shown by the transwell assay. (E) The expression of IncCSMD1 was markedly elevated in xenograft tumor derived from Hep3B cells overexpressing IncCSMD1 compared with that in the tumor from the control cells, which was detected by RT-qPCR. (F) The vast majority of IncCSMD1 transcripts are located in the nucleus of HCC cells and only a few are in cytoplasm, in which qRT-PCR was

used to measure lncCSMD1 expression in the RNAs extracted from cytoplasm and nucleus, respectively. Data represent the mean  $\pm$  SD of triplicate experiments and was analyzed by Student t test. \*p < 0.05.

**A**

| GENE SETS                      | SIZE       | ES             |
|--------------------------------|------------|----------------|
| HALLMARK_G2M_CHECKPOINT        | 154        | 0.66824        |
| HALLMARK_E2F_TARGETS           | 157        | 0.61714        |
| HALLMARK_MITOTIC_SPINDLE       | 145        | 0.59637        |
| <b>HALLMARK_MYC_TARGETS_V1</b> | <b>157</b> | <b>0.49055</b> |
| HALLMARK_FATTY_ACID_METABOLISM | 134        | 0.43156        |
| HALLMARK_MTORC1_SIGNALING      | 160        | 0.39765        |
| HALLMARK_ADIPOGENESIS          | 154        | 0.36161        |
| HALLMARK_DNA_REPAIR            | 116        | 0.35941        |

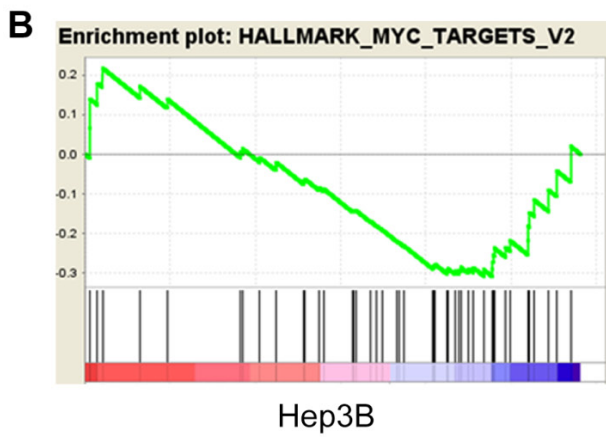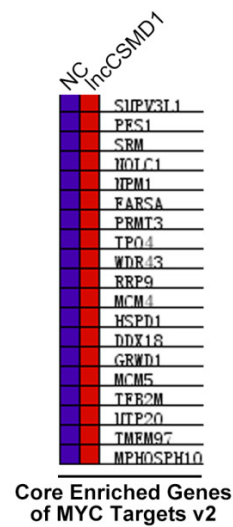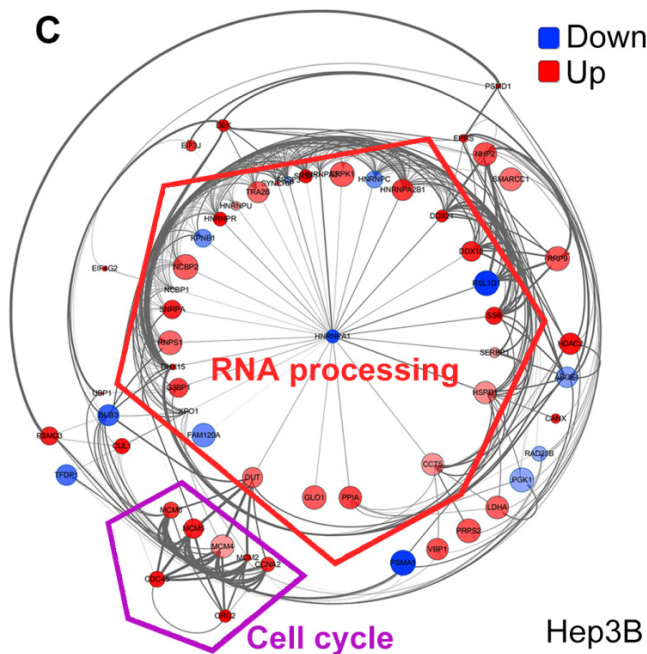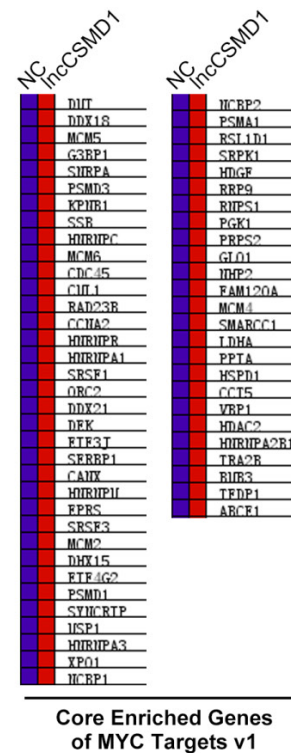

**Figure S4. lncCSMD1 overexpression significantly enriched Myc target genes in HCC cells.** (A) GSEA analysis revealed lncCSMD1 overexpression could markedly enriched several gene sets including Myc targets v1, which was involved in regulating proliferation of HCC cells; (B) Myc targets v2 were also enriched by lncCSMD1 overexpression. (C) The protein-protein interaction (PPI) network analysis shows the interaction of Myc target genes in set v1.

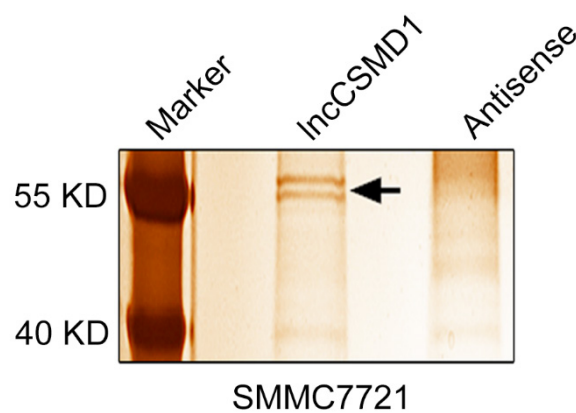

**Figure S5. The specific band pulled down by lncCSMD1 in SMMC7721 cells.** Silver staining of the precipitated complexes pulled down by lncCSMD1 sense and antisense probes on the PAGE gel, and a special bind (arrow) can be observed in the lane of sense probe.

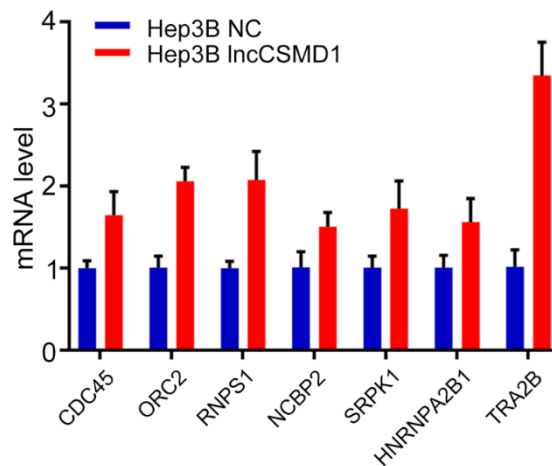

**Figure S6. lncCSMD1 overexpression could activate the transcription of MYC target genes.** qRT-PCR was used to examine the mRNA level of Myc target genes in Hep3B cells with lncCSMD1 overexpression or negative vector.

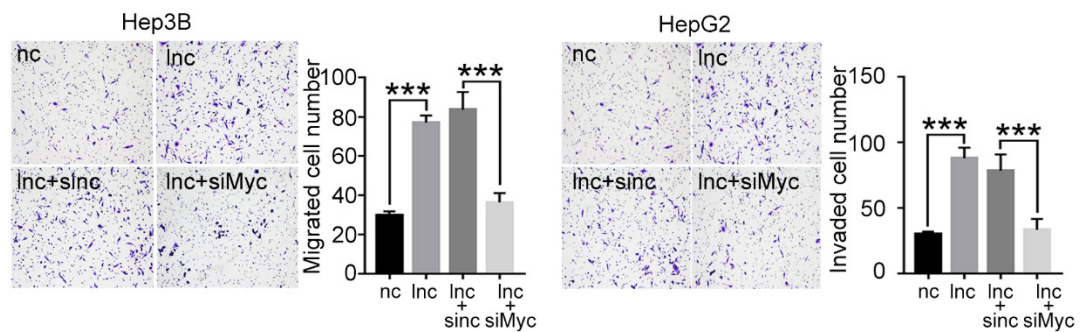

**Figure S7. The knock-down of MYC could abolish the enhanced migration induced by lncCSMD1 overexpression.** MYC was knocked down by siRNAs in Hep3B and HepG2 cells with overexpression of lncCSMD1, and then the migration ability was detected with transwell assay. The result shows that downregulated MYC completely abolishes the enhanced cell migration induced by lncCSMD1 overexpression compared with lncCSMD1 overexpression alone or plus siRNA control treatment in Hep3B and HepG2 cells.

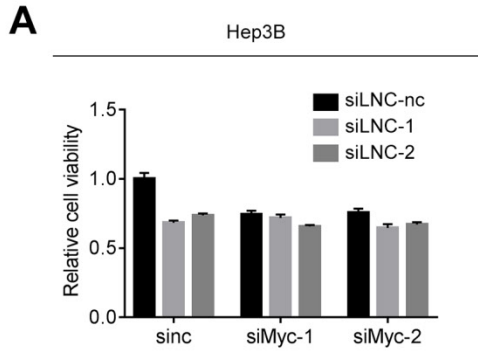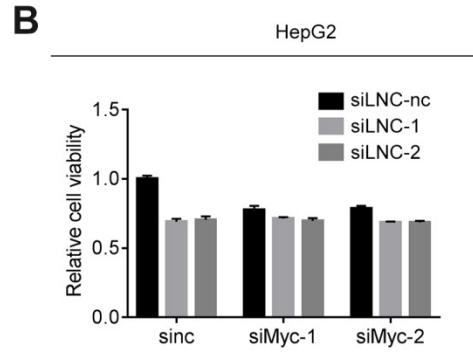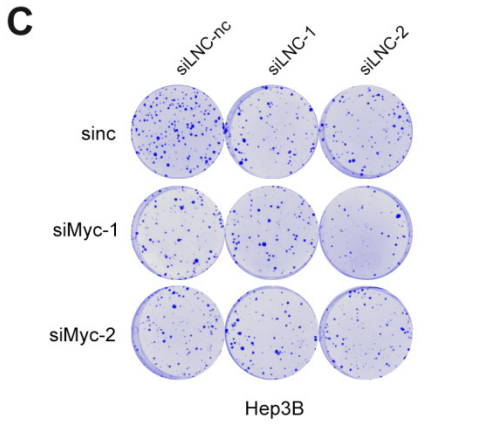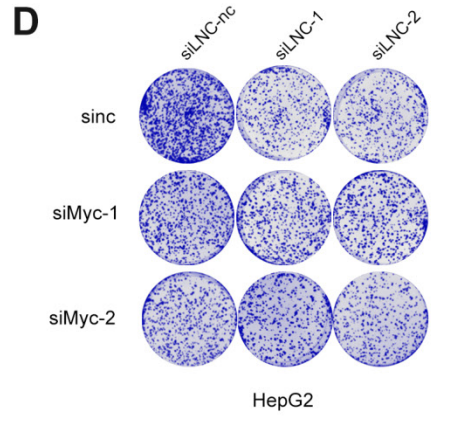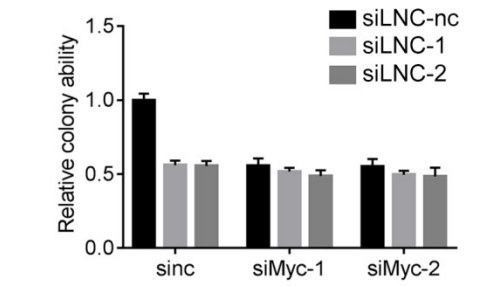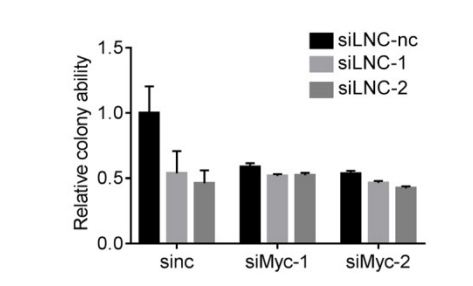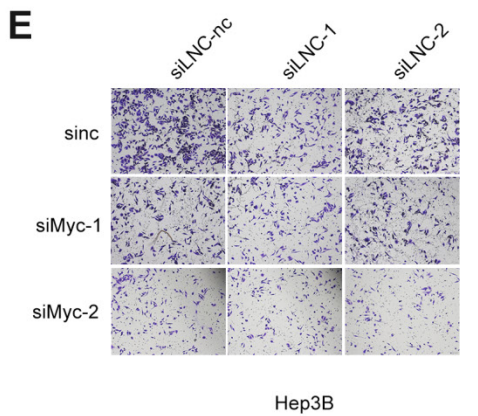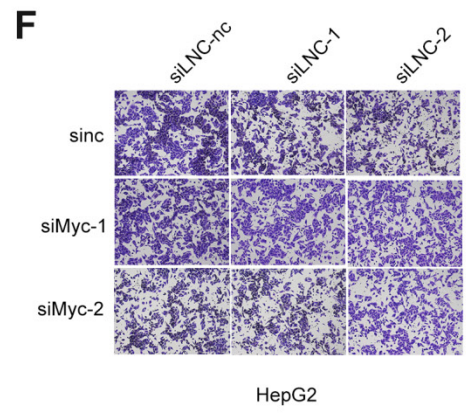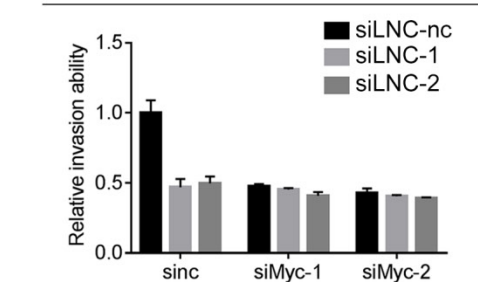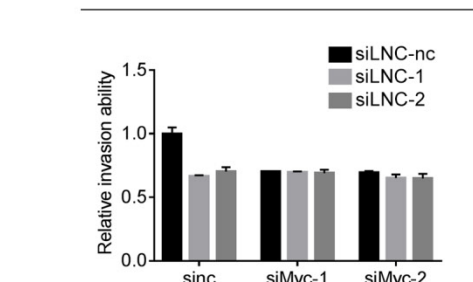



**Figure S8. The knock-down of LncCSMD1 failed to inhibit oncogenic phenotypes of HCC cells with downregulation of MYC.** After lncCSMD1 was downregulated for 48 hours by siRNA in Hep3B and HepG2 cells with MYC knockdown by siRNA, CCK8 (A, B), colony formation (C, E) and invasion assays (D, F) were conducted to evaluate the effect of knockdown lncCSMD1 on oncogenic phenotypes of the HCC cells. The results demonstrate that lncCSMD1 knockdown cannot further affect the oncogenic phenotypes inhibited by MYC downregulation in Hep3B and HepG2 cells, indicating that lncCSMD1 promotes the oncogenic phenotypes via activating MYC signaling pathway.

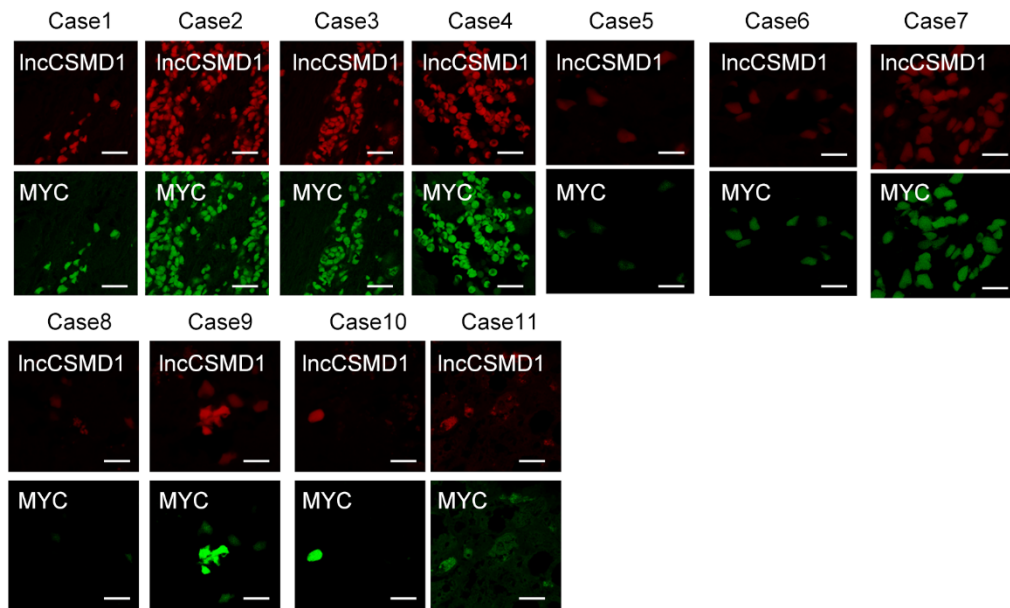

**Figure S9. The correlation between lncCSMD1 and MYC protein level in 11 HCC tissue samples.** LncCSMD1 RNA and Myc protein in 11 primary HCC tissue samples were simultaneously detected by RNA FISH (for lncCSMD1) and immunofluorescence, respectively, and a positive correlation between lncCSMD1 and MYC protein was observed.

## 2. SUPPLEMENTAL TABLES

**Table S1. Relationship between lncCSMD1 level and the clinical characteristics of HCC patients in the discovery cohort (n=127).**

| Characteristics        | lncCSMD1 intensity |                | P-value           |
|------------------------|--------------------|----------------|-------------------|
|                        | Low intensity      | high intensity |                   |
| <b>Age(years)</b>      |                    |                |                   |
| ≥50                    | 38 (59.4%)         | 28 (44.4%)     | 0.110             |
| <50                    | 26 (40.6%)         | 35 (55.6%)     |                   |
| <b>Gender</b>          |                    |                |                   |
| Female                 | 8 (12.5%)          | 8 (12.7%)      | 1.000             |
| Male                   | 56 (87.5%)         | 55 (87.3%)     |                   |
| <b>AFP (μg/L)</b>      |                    |                |                   |
| >400                   | 42 (65.6%)         | 34 (54.0%)     | 0.210             |
| ≤400                   | 22 (34.4%)         | 29 (46.0%)     |                   |
| <b>HBsAg</b>           |                    |                |                   |
| Negative               | 11 (17.2%)         | 3 (4.8%)       | <b>0.044</b>      |
| Positive               | 53 (82.8%)         | 60 (95.2%)     |                   |
| <b>HBV DNA</b>         |                    |                |                   |
| Negative               | 26 (40.6%)         | 15 (23.8%)     | 0.058             |
| Positive               | 38 (59.4%)         | 48 (76.2%)     |                   |
| <b>Pathology Grade</b> |                    |                |                   |
| I                      | 3 (4.7%)           | 0 (0.0%)       | 0.260             |
| II                     | 46 (71.9%)         | 45 (71.4%)     |                   |
| III                    | 15 (23.4%)         | 18 (28.6%)     |                   |
| <b>Cirrhosis</b>       |                    |                |                   |
| NO                     | 33 (51.6%)         | 20 (31.7%)     | <b>0.031</b>      |
| Yes                    | 31 (48.4%)         | 43 (68.3%)     |                   |
| <b>Main Size</b>       |                    |                |                   |
| <5cm                   | 32 (50.0%)         | 24 (38.1%)     | 0.210             |
| ≥5cm                   | 32 (50.0%)         | 39 (61.9%)     |                   |
| <b>Tumor Number</b>    |                    |                |                   |
| 1                      | 54 (84.4%)         | 33 (52.4%)     | <b>&lt; 0.001</b> |
| ≥2                     | 10 (15.6%)         | 30 (47.6%)     |                   |
| <b>Tumor capsule</b>   |                    |                |                   |
| No                     | 18 (28.1%)         | 25 (39.7%)     | 0.190             |
| Yes                    | 46 (71.9%)         | 38 (60.3%)     |                   |
| <b>Cancer Embolus</b>  |                    |                |                   |
| No                     | 54 (84.4%)         | 48 (76.2%)     | 0.270             |
| Yes                    | 10 (15.6%)         | 15 (23.8%)     |                   |
| <b>TNM stage</b>       |                    |                |                   |
| I                      | 44 (68.8%)         | 24 (38.1%)     | <b>&lt; 0.001</b> |
| II                     | 13 (20.3%)         | 15 (23.8%)     |                   |
| III                    | 7 (10.9%)          | 24 (38.1%)     |                   |
| <b>Metastasis</b>      |                    |                |                   |
| No                     | 59 (92.2%)         | 45 (71.4%)     | <b>0.003</b>      |
| Yes                    | 5 (7.8%)           | 18 (28.6%)     |                   |
| <b>Relapse</b>         |                    |                |                   |
| No                     | 45 (70.3%)         | 37 (58.7%)     | 0.200             |
| Yes                    | 19 (29.7%)         | 26 (41.3%)     |                   |

**Table S2. Relationship between lncCSMD1 level and the clinical characteristics of HCC patients in the validation cohort (n=260).**

| Characteristics        | lncCSMD1 level |                 | P-value      |
|------------------------|----------------|-----------------|--------------|
|                        | low expression | high expression |              |
| <b>Age(years)</b>      |                |                 |              |
| ≥50                    | 66 (50.8%)     | 68 (52.3%)      | 0.900        |
| <50                    | 64 (49.2%)     | 62 (47.7%)      |              |
| <b>Gender</b>          |                |                 |              |
| Female                 | 18 (13.8%)     | 17 (13.1%)      | 1.000        |
| Male                   | 112 (86.2%)    | 113 (86.9%)     |              |
| <b>AFP (μg/L)</b>      |                |                 |              |
| >400                   | 88 (67.7%)     | 83 (63.8%)      | 0.600        |
| ≤400                   | 42 (32.3%)     | 47 (36.2%)      |              |
| <b>HBsAg</b>           |                |                 |              |
| Negative               | 20 (15.4%)     | 7 (5.4%)        | <b>0.013</b> |
| Positive               | 110 (84.6%)    | 123 (94.6%)     |              |
| <b>HBV DNA</b>         |                |                 |              |
| Negative               | 40 (30.8%)     | 33 (25.4%)      | 0.410        |
| Positive               | 90 (69.2%)     | 97 (74.6%)      |              |
| <b>Pathology Grade</b> |                |                 |              |
| I                      | 8 (6.2%)       | 9 (6.9%)        | 0.880        |
| II                     | 84 (64.6%)     | 80 (61.5%)      |              |
| III                    | 38 (29.2%)     | 41 (31.5%)      |              |
| <b>Cirrhosis</b>       |                |                 |              |
| NO                     | 55 (42.3%)     | 53 (40.8%)      | 0.900        |
| Yes                    | 75 (57.7%)     | 77 (59.2%)      |              |
| <b>Main Size</b>       |                |                 |              |
| <5cm                   | 50 (38.5%)     | 53 (40.8%)      | 0.800        |
| ≥5cm                   | 80 (61.5%)     | 77 (59.2%)      |              |
| <b>Tumor Number</b>    |                |                 |              |
| 1                      | 91 (70.0%)     | 81 (62.3%)      | 0.24         |
| ≥2                     | 39 (30.0%)     | 49 (37.7%)      |              |
| <b>Tumor capsule</b>   |                |                 |              |
| No                     | 43 (33.1%)     | 48 (36.9%)      | 0.600        |
| Yes                    | 87 (66.9%)     | 82 (63.1%)      |              |
| <b>Cancer Embolus</b>  |                |                 |              |
| No                     | 95 (73.1%)     | 100 (76.9%)     | 0.570        |
| Yes                    | 35 (26.9%)     | 30 (23.1%)      |              |
| <b>TNM stage</b>       |                |                 |              |
| I                      | 58 (44.6%)     | 53 (40.8%)      | 0.640        |
| II                     | 35 (26.9%)     | 42 (32.3%)      |              |
| III                    | 37 (28.5%)     | 35 (26.9%)      |              |
| <b>Metastasis</b>      |                |                 |              |
| No                     | 116 (89.2%)    | 110 (84.6%)     | 0.360        |
| Yes                    | 14 (10.8%)     | 20 (15.4%)      |              |
| <b>Relapse</b>         |                |                 |              |
| No                     | 86 (66.2%)     | 74 (56.9%)      | 0.160        |
| Yes                    | 44 (33.8%)     | 56 (43.1%)      |              |

**Table S3. Relationship between lncCSMD1 expression and the clinical characteristics of HCC patients in external validation cohort 1 (n=92).**

| Characteristics        | lncCSMD1 level |                 | P-value           |
|------------------------|----------------|-----------------|-------------------|
|                        | Low expression | high expression |                   |
| <b>Age(years)</b>      |                |                 |                   |
| ≥50                    | 10 (21.7%)     | 5 (10.9%)       | 0.260             |
| <50                    | 36 (78.3%)     | 41 (89.1%)      |                   |
| <b>Gender</b>          |                |                 |                   |
| Female                 | 33 (71.7%)     | 33 (71.7%)      | 1.000             |
| Male                   | 13 (28.3%)     | 13 (28.3%)      |                   |
| <b>AFP (μg/L)</b>      |                |                 |                   |
| >400                   | 28 (60.9%)     | 29 (63.0%)      | 1.000             |
| ≤400                   | 18 (39.1%)     | 17 (37.0%)      |                   |
| <b>HBsAg</b>           |                |                 |                   |
| Negative               | 9 (26.5%)      | 14 (32.6%)      | 0.620             |
| Positive               | 25 (73.5%)     | 29 (67.4%)      |                   |
| <b>HBV DNA</b>         |                |                 |                   |
| Negative               | 20 (50.0%)     | 9 (21.4%)       | <b>0.011</b>      |
| Positive               | 20 (50.0%)     | 33 (78.6%)      |                   |
| <b>Pathology Grade</b> |                |                 |                   |
| I                      | 14 (30.4%)     | 4 (9.8%)        | <b>&lt; 0.001</b> |
| II                     | 27 (58.7%)     | 19 (46.3%)      |                   |
| III                    | 5 (10.9%)      | 18 (43.9%)      |                   |
| <b>Cirrhosis</b>       |                |                 |                   |
| NO                     | 8 (17.4%)      | 6 (13.0%)       | 0.770             |
| Yes                    | 38 (82.6%)     | 40 (87.0%)      |                   |
| <b>Main Size</b>       |                |                 |                   |
| <5cm                   | 31 (67.4%)     | 17 (37.0%)      | <b>0.006</b>      |
| ≥5cm                   | 15 (32.6%)     | 29 (63.0%)      |                   |
| <b>Tumor Number</b>    |                |                 |                   |
| 1                      | 45 (97.8%)     | 25 (54.3%)      | <b>&lt; 0.001</b> |
| ≥2                     | 1 (2.2%)       | 21 (45.7%)      |                   |
| <b>Tumor capsule</b>   |                |                 |                   |
| No                     | 40 (87.0%)     | 30 (65.2%)      | <b>0.026</b>      |
| Yes                    | 6 (13.0%)      | 16 (34.8%)      |                   |
| <b>Cancer Embolus</b>  |                |                 |                   |
| No                     | 5 (10.9%)      | 18 (39.1%)      | <b>0.003</b>      |
| Yes                    | 41 (89.1%)     | 28 (60.9%)      |                   |
| <b>TNM stage</b>       |                |                 |                   |
| I                      | 33 (71.7%)     | 10 (21.7%)      | <b>&lt; 0.001</b> |
| II                     | 0 (0.0%)       | 10 (21.7%)      |                   |
| III                    | 13 (28.3%)     | 26 (56.5%)      |                   |

**Table S4. Relationship between lncCSMD1 expression and the clinical characteristics of HCC patients of external cohort 2 (n=124).**

| Characteristics        | lncCSMD1 level |                 | P-value           |
|------------------------|----------------|-----------------|-------------------|
|                        | Low expression | high expression |                   |
| <b>Age(years)</b>      |                |                 |                   |
| ≥50                    | 4 (6.5%)       | 5 (8.1%)        | 1.000             |
| <50                    | 58 (93.5%)     | 57 (91.9%)      |                   |
| <b>Gender</b>          |                |                 |                   |
| Female                 | 40 (64.5%)     | 36 (58.1%)      | 0.580             |
| Male                   | 22 (35.5%)     | 26 (41.9%)      |                   |
| <b>AFP (μg/L)</b>      |                |                 |                   |
| >400                   | 40 (64.5%)     | 35 (56.5%)      | 0.460             |
| <400                   | 22 (35.5%)     | 27 (43.5%)      |                   |
| <b>HBsAg</b>           |                |                 |                   |
| Negative               | 23 (37.1%)     | 24 (38.7%)      | 1.000             |
| Positive               | 39 (62.9%)     | 38 (61.3%)      |                   |
| <b>HBV DNA</b>         |                |                 |                   |
| Negative               | 27 (45.8%)     | 9 (16.4%)       | <b>0.001</b>      |
| Positive               | 32 (54.2%)     | 46 (83.6%)      |                   |
| <b>Pathology Grade</b> |                |                 |                   |
| I                      | 2 (4.1%)       | 1 (7.1%)        | 0.350             |
| II                     | 12 (24.5%)     | 1 (7.1%)        |                   |
| III                    | 35 (71.4%)     | 12 (85.7%)      |                   |
| <b>Cirrhosis</b>       |                |                 |                   |
| NO                     | 8 (12.9%)      | 6 (9.7%)        | 0.780             |
| Yes                    | 54 (87.1%)     | 56 (90.3%)      |                   |
| <b>Main Size</b>       |                |                 |                   |
| <5cm                   | 35 (56.5%)     | 20 (32.3%)      | <b>0.011</b>      |
| ≥5cm                   | 27 (43.5%)     | 42 (67.7%)      |                   |
| <b>Tumor Number</b>    |                |                 |                   |
| 1                      | 37 (59.7%)     | 4 (6.5%)        | <b>&lt; 0.001</b> |
| ≥2                     | 25 (40.3%)     | 58 (93.5%)      |                   |
| <b>Tumor capsule</b>   |                |                 |                   |
| No                     | 16 (25.8%)     | 40 (64.5%)      | <b>&lt; 0.001</b> |
| Yes                    | 46 (74.2%)     | 22 (35.5%)      |                   |
| <b>Cancer Embolus</b>  |                |                 |                   |
| No                     | 14 (22.6%)     | 50 (80.6%)      | <b>&lt; 0.001</b> |
| Yes                    | 48 (77.4%)     | 12 (19.4%)      |                   |
| <b>TNM stage</b>       |                |                 |                   |
| I                      | 11 (17.7%)     | 2 (3.2%)        | <b>0.006</b>      |
| II                     | 24 (38.7%)     | 18 (29.0%)      |                   |
| III                    | 27 (43.5%)     | 42 (67.7%)      |                   |

**Table S5. Multivariate Cox analysis of lncCSMD1 expression and clinical characteristics associated with survival in the Discovery and Validation cohorts.**

| Characteristics              | Discovery cohort |                  | Validation cohort |                  |
|------------------------------|------------------|------------------|-------------------|------------------|
|                              | N=127            |                  | N=260             |                  |
|                              | HR (95% CI)      | P value          | HR (95% CI)       | P value          |
| <b>Overall survival</b>      |                  |                  |                   |                  |
| lncCSMD1                     | 1.51 (0.81-2.81) | 0.180            | 1.67 (1.12-2.51)  | <b>0.013</b>     |
| AFP                          | 1.22 (0.67-2.22) | 0.500            |                   |                  |
| Pathology Grade              |                  |                  | 1.18 (0.80-1.74)  | 0.402            |
| Cirrhosis                    | 1.53 (0.85-2.74) | 0.140            | 1.12 (0.76-1.67)  | 0.560            |
| Main.Size                    | 1.50 (0.83-2.71) | 0.170            |                   |                  |
| Tumor Number                 | 1.07 (0.45-2.57) | 0.860            | 1.58 (1.03-2.43)  | <b>0.038</b>     |
| Tumor Capsule                | 0.73 (0.42-1.27) | 0.270            | 0.70 (0.46-1.08)  | 0.110            |
| Cancer Embolus               | 1.47 (0.74-2.89) | 0.261            | 1.29 (0.69-2.41)  | 0.427            |
| TNM Stage                    | 2.13 (1.23-3.69) | <b>0.006</b>     | 1.31 (0.91-1.88)  | 0.145            |
| Metastasis                   | 0.94 (0.51-1.75) | 0.867            | 3.11 (1.97-4.92)  | <b>&lt;0.001</b> |
| Relapse                      | 1.79 (1.06-3.01) | <b>0.028</b>     | 1.92 (1.31-2.83)  | <b>&lt;0.001</b> |
| <b>Disease free survival</b> |                  |                  |                   |                  |
| lncCSMD1                     | 1.17 (0.68-1.99) | 0.568            | 1.68 (1.12-2.52)  | <b>0.013</b>     |
| AFP                          | 1.60 (0.93-2.75) | 0.090            | 1.10 (0.74-1.63)  | 0.650            |
| Pathology Grade              |                  |                  | 1.13 (0.77-1.65)  | 0.543            |
| Cirrhosis                    | 1.65 (0.95-2.86) | 0.074            |                   |                  |
| Main Size                    | 1.47 (0.73-2.95) | 0.282            | 1.47 (0.84-2.57)  | 0.179            |
| Tumor Number                 | 1.19 (0.51-2.77) | 0.686            | 1.88 (1.21-2.93)  | <b>0.005</b>     |
| Tumor Capsule                | 0.64 (0.38-1.08) | 0.093            |                   |                  |
| Cancer Embolus               | 1.41 (0.52-3.81) | 0.497            | 1.45 (0.77-2.72)  | 0.247            |
| TNM Stage                    | 1.87 (1.11-3.16) | <b>0.019</b>     | 1.01 (0.66-1.56)  | 0.953            |
| Metastasis                   | 1.54 (0.83-2.87) | 0.173            | 2.74 (1.73-4.34)  | <b>&lt;0.001</b> |
| Relapse                      | 5.32 (3.19-8.87) | <b>&lt;0.001</b> | 1.86 (1.26-2.75)  | <b>0.0017</b>    |

**Table S6. Multivariate Cox analysis of IncCSMD1 expression and clinical characteristics associated with survival in the two External validation cohorts.**

| Characteristics              | Ext Valid Cohort 1<br>N=92 |              | Ext Valid Cohort 2<br>N=124 |              |
|------------------------------|----------------------------|--------------|-----------------------------|--------------|
|                              | HR (95%CI)                 | P value      | HR (95% CI)                 | P value      |
| <b>Overall survival</b>      |                            |              |                             |              |
| IncCSMD1                     | 4.85 (1.37-17.11)          | <b>0.014</b> | 9.05 (1.85-44)              | <b>0.007</b> |
| AFP                          |                            |              |                             |              |
| Pathology Grade              | 2.43 (1.29-4.58)           | <b>0.006</b> | 2.78 (0.38-20)              | 0.317        |
| Cirrhosis                    |                            |              |                             |              |
| Main Size                    | 11.0 (1.56-77.9)           | <b>0.016</b> | 0.003 (0.0-Inf)             | 0.998        |
| Tumor Number                 | 1.92 (0.56-6.63)           | 0.300        | 2.73 (0.22-33.9)            | 0.435        |
| Tumor Capsule                | 0.50 (0.20-1.26)           | 0.140        |                             |              |
| Cancer Embolus               | 2.50 (0.77-8.10)           | 0.126        | 1.04 (0.1-11.4)             | 0.973        |
| TNM stage                    | 0.21 (0.06-0.67)           | <b>0.009</b> | 454 (0.00-Inf)              | 0.998        |
| <b>Disease free survival</b> |                            |              |                             |              |
| IncCSMD1                     | 1.57 (0.64-3.84)           | 0.326        | 9.06 (1.84-44.5)            | <b>0.007</b> |
| Pathology Grade              | 1.75 (1.06-2.91)           | <b>0.030</b> | 2.88 (0.39-21.2)            | 0.298        |
| Tumor Number                 | 0.65 (0.27-1.52)           | 0.319        | 2.83 (0.23-34.8)            | 0.415        |
| Tumor Capsule                | 0.87 (0.40-1.89)           | 0.731        |                             |              |
| Cancer Embolus               | 0.66 (0.29-1.50)           | 0.319        | 1.09 (0.10-11.6)            | 0.946        |
| TNM stage                    |                            |              | 1.61 (0.73-3.56)            | 0.242        |

**Table S7. Univariate Cox analysis of lncCSMD1 expression and clinical characteristics associated with survival in all patients of the four cohorts.**

| Characteristics              | All patients     |         |
|------------------------------|------------------|---------|
|                              | N=603            |         |
|                              | HR (95%CI)       | P value |
| <b>Overall survival</b>      |                  |         |
| lncCSMD1                     | 3.80 (2.80-5.00) | <0.001  |
| Age                          | 0.75 (0.58-0.96) | 0.025   |
| Gender                       | 1.30 (0.99-1.70) | 0.055   |
| AFP                          | 1.60 (1.30-2.10) | <0.001  |
| Pathology Grade              | 1.50 (1.20-1.70) | <0.001  |
| Cirrhosis                    | 1.20 (0.89-1.50) | 0.260   |
| Main Size                    | 2.30 (1.70-3.00) | <0.001  |
| Tumor Number                 | 2.80 (2.20-3.60) | <0.001  |
| Tumor capsule                | 1.00 (0.80-1.30) | 0.800   |
| Cancer Embolus               | 0.84 (0.64-1.10) | 0.190   |
| TNM stage                    | 1.70 (1.50-2.00) | <0.001  |
| <b>Disease free survival</b> |                  |         |
| lncCSMD1                     | 2.70 (2.10-3.40) | <0.001  |
| Age                          | 0.65 (0.52-0.81) | <0.001  |
| Gender                       | 1.50 (1.20-1.90) | 0.001   |
| AFP                          | 1.60 (1.30-2.00) | <0.001  |
| Pathology Grade              | 1.20 (1.00-1.40) | 0.009   |
| Cirrhosis                    | 0.98 (0.78-1.20) | 0.900   |
| Main Size                    | 1.80 (1.50-2.30) | <0.001  |
| Tumor Number                 | 2.10 (1.70-2.60) | <0.001  |
| Tumor capsule                | 1.10 (0.85-1.30) | 0.590   |
| Cancer Embolus               | 0.76 (0.60-0.96) | 0.021   |
| TNM stage                    | 1.40 (1.20-1.60) | <0.001  |



**Table S8. Multivariate Cox analysis of lncCSMD1 expression and clinical characteristics associated with survival in all patients of the four cohorts.**

| Characteristics              | All patients<br>N=603 |                  |
|------------------------------|-----------------------|------------------|
|                              | HR (95%CI)            | P value          |
| <b>Overall survival</b>      |                       |                  |
| lncCSMD1                     | 2.76 (2.03-3.74)      | <b>&lt;0.001</b> |
| Age                          | 0.67 (0.52-0.88)      | <b>0.004</b>     |
| AFP                          | 1.21 (0.94-1.57)      | 0.132            |
| Pathology Grade              | 1.04 (0.88-1.24)      | 0.607            |
| Main Size                    | 1.86 (1.31-2.64)      | <b>0.001</b>     |
| Tumor Number                 | 2.01 (1.45-2.78)      | <b>&lt;0.001</b> |
| TNM stage                    | 1.06 (0.85-1.32)      | 0.578            |
| <b>Disease free survival</b> |                       |                  |
| lncCSMD1                     | 2.21 (1.72-2.84)      | <b>&lt;0.001</b> |
| Age                          | 0.63 (0.50-0.79)      | <b>&lt;0.001</b> |
| Gender                       | 1.44 (1.11-1.88)      | <b>0.006</b>     |
| AFP                          | 1.32 (1.05-1.66)      | <b>0.016</b>     |
| Pathology Grade              | 0.96 (0.82-1.13)      | 0.673            |
| Main Size                    | 1.68 (1.22-2.32)      | <b>0.001</b>     |
| Tumor Number                 | 1.83 (1.36-2.46)      | <b>&lt;0.001</b> |
| Cancer Embolus               | 1.06 (0.78-1.43)      | 0.684            |
| TNM stage                    | 0.99 (0.79-1.24)      | 0.957            |

**Table S9. Primers used in this study.**

| <b>Primers for q-PCR</b>        | Sequences               |
|---------------------------------|-------------------------|
| GAPDH Forward                   | CTCCTCCTGTTCGACAGTCAGC  |
| GAPDH Reverse                   | CCCAATACGACCAAATCCGTT   |
| lncCSMD1 Forward                | CAACCCACGCCCATGAATCT    |
| lncCSMD1 Reverse                | AGTGGCAGGGACGACAATG     |
| Myc Forward                     | TCCACCTCCAGCTTGTACCT    |
| Myc Reverse                     | GCTGTCGTTGAGAGGGTAGG    |
| E2F Forward                     | CATCCCAGGAGGTCACCTTCTG  |
| E2F Reverse                     | GACAACAGCGGTTCTTGCTC    |
| UTP20 Forward                   | GCAGATGGATTTCTACCCACAC  |
| UTP20 Reverse                   | GAGGTGAAAGCCCATTCTAACAA |
| RRP9 Forward                    | GGACTGTACGTGTGTGGAAGA   |
| RRP9 Reverse                    | CTCCTCATTGATTAGGTGGATGC |
| DHX15 Forward                   | GGGGACCGATGGGAAGGAT     |
| DHX15 Reverse                   | TAGCATTTGTTGAAGCTCGCA   |
| MCM5 Forward                    | AGCATTCGTAGCCTGAAGTCG   |
| MCM5 Reverse                    | CGGCACTGGATAGAGATGCG    |
| DDX21 Forward                   | CTTTGCCATCCCTTTGATTGAGA |
| DDX21 Reverse                   | GTAGGTGCAAGAACCAGTACC   |
| CDC45 Forward                   | CTTGAAGTTCCCGCCTATGAAG  |
| CDC45 Reverse                   | GCATGGTTTGCTCCACTATCTC  |
| ORC2 Forward                    | AGAGCTAAACTGGATCAGCAAAC |
| ORC2 Reverse                    | CACAATGTTGAACCCAAGGTGTA |
| RNPS1 Forward                   | AGAGCTTGCTAGGAGTCAAAGA  |
| RNPS1 Reverse                   | TTGAGCGATCCTTGGACTTCT   |
| NCBP2 Forward                   | AAAACGCCATGCGGTACATAA   |
| NCBP2 Reverse                   | GCCTGCCCTCCTTAAAGCC     |
| SRPK1 Forward                   | ATGGAGCGGAAAGTGCTTG     |
| SRPK1 Reverse                   | GAGCCTCGGTGCTGAGTTT     |
| HNRNPA2B1 Forward               | ATTGATGGGAGAGTAGTTGAGCC |
| HNRNPA2B1 Reverse               | AATTCCGCCAACAAACAGCTT   |
| TRA2B Forward                   | GCAGTCTAGGCGTTCAAGAGG   |
| TRA2B Reverse                   | CATTGGCACGTTCTTTAGCTTC  |
| U6 Forward                      | CTCGCTTCGGCAGCACA       |
| U6 Reverse                      | AACGCTTCACGAATTTGCGT    |
| <b>lncCSMD1 siRNA:</b>          |                         |
| lncCSMD1 - si#1 target sequence | CCTCCTGATCTGCAGCATT     |
| lncCSMD1 - si#2 target sequence | GCGGATGAAGACATTGATG     |
| <b>Myc siRNA:</b>               |                         |
| Myc- si#1 target sequence       | CCTGAGACAGATCAGCAACAA   |
| <b>Control siRNA:</b>           |                         |
| Myc - si#NC Forward             | GAGGCGAAGGATGACAAAGGGA  |
| Myc - si#NC Reverse             | GACAGATGTCCAGCCACAATTCT |
